# Supplementary material
Source: publisher site journal article supplement (https://www.dovepress.com/article/491255)
Supplement: Supplementary file 1 [file get_supplementary_file.php]

Supplementary Material

# Supplemental material and methods

**Measurement of anthropometric measurements**

Anthropometric measurements were taken by trained nurses. Data for height, weight, and waist circumference (WC) were acquired following a protocol standardized to an accuracy of 0.1 kg and 0.1 cm, respectively. During the measurements, participants were asked to wear light clothing, no hats, and no shoes. At the end of normal expiration, WC was measured from the midpoint between the lower ribs and the upper edge of the iliac crest to the nearest 0.1 cm. Blood pressure (BP) was measured twice consecutively with a 30- to 60-s interval after at least 5 min rest in the sitting position using a validated automated blood pressure monitor (Omron Health Care, Kyoto, Japan). These two blood pressure readings were averaged for analysis. In the absence of an inter-arm blood pressure difference of 10 mmHg or more, all blood pressure measurements were performed on the left arm during the whole study. Participants were advised to avoid cigarette smoking, and the consumption of coffee, tea, and alcohol for at least 2 hours before BP measurements.

**Definitions**

Criteria for hypertension included self-reported hypertension, current use of anti-hypertensive medication, or systolic blood pressure (SBP) ≥ 140 mmHg and/or diastolic blood pressure (DBP) ≥ 90 mmHg recorded for at least three consecutive readings. CHD was defined as having at least one of the following conditions: (1) percutaneous coronary angiography or computed tomographic angiography (CTA) examination showed that at least one coronary artery trunk or primary branch had ≥ 50% stenosis; (2) typical exertional angina symptoms with positive stress test (electrocardiogram stress test, stress echocardiography or nuclide myocardial stress imaging); (3) previously diagnosed Myocardial infarction; (4) previously diagnosed unstable angina pectoris (typical ischemic chest pain + ECG changes + increased markers of muscle damage; or the dynamic changes of ST segment during ischemic attack, or coronary angiography confirmed the existence of severe lesions leading to symptoms) (1-4). The diagnosis of diabetes is determined by several criteria, including the past and current use of any hypoglycemic drug, a fasting blood glucose level greater than 7.0 mmol/L, a 2-hour oral glucose tolerance test blood glucose level greater than or equal to 11.1 mmol/L, or a random blood glucose level greater than or equal to 11.1 mmol/L. Diabetes is diagnosed if any of these criteria are met (5-7). The diagnosis of hyperlipidaemia was based on the Chinese diagnostic guidelines: total cholesterol ≥ 240 mg/dL (6.2 mmol/L), LDL cholesterol ≥ 160 mg/dL (4.1 mmol/L), and triglycerides ≥ 200 mg/dL (2.3 mmol/L), and the diagnosis of hyperlipidaemia was based on the fulfilment of any of these criteria (8, 9).

**Details of the statistical analyses.**

Variables of baseline characteristics are shown as n (%) if categorical, mean (SD) if normally distributed. In order to compare features between the two groups, Chi-square test was used for categorical variables, and one-way analysis of variance, or the Kruskal-Wallis test was used for continuous variables with normal and skew distributions.

Prior to any regression analysis, we tested multicollinearity among the predictors by checking for the variance inflation factor. The relationship between obesity metabolism index and hyperuricemia was examined by multivariate logistic regression model. This study set four different models (Model 1: unadjusted; Model 2: adjusted for age, sex, BMI, smoking status, Diabetes, and Hyperlipidemia; Model 3: Model 2 plus adjustment for ALT, AST, Cr, eGFR, TC, HDL.C, LDL.C, FPG, and UA; Model 4: Model 3 plus adjustment for use of statins, aspirin, diuretics, beta-blockers, calcium channel blockers, ACEIs/ARBs, and oral hypoglycemic agents. In addition, the restricted inverse square spline (four nodes at the 5th, 35th, 65th, and 95th percentiles of the obesity metabolism index) was used to evaluate the dose-response relationship between obesity metabolism index and the risks of hyperuricemia. Additionally, we used restricted cubic spline (RCS) to evaluate the nonlinear dose-response relationship between these indices and hyperuricaemia. Finally, we employed receiver operating characteristic (ROC) and decision curve analysis (DCA) to determine their optimal diagnostic ability for hyperuricaemia. In addition, subgroup analyses were conducted by gender, age, hyperlipidemia, and diabetes, and multiplicative interaction tests were applied.

We performed a series of sensitivity analyses to assess the robustness of our findings as follows: First, we excluded participants taking diuretics, considering the potential effect of diuretics on UA metabolism, and the results were consistent with the overall trend. Next, since the UA metabolism of obese patients might be higher, we excluded obese patients with BMI>30 kg/m2, and the results remained stable. Moreover, we excluded patients with cancer to account for the potential influence of anti-tumor drugs, and the results remained unchanged. Finally, our assessment of the E-values indicated that the impact of unmeasured confounders on our results was minimal, reinforcing the overall reliability of our findings.

All analyses were done using R (4.2.2). All P-values were two-sided, and P-values of <0.05 denoted statistical significance.

# Supplementary Figures and Tables

## Supplementary Tables

**Table S1**. Collinearity diagnostics steps.

| Variable | Step1  VIF | Step1  VIF |
| --- | --- | --- |
| Age | 3.831043 | 3.831043 |
| Sex | 2.397935 | 2.397935 |
| BMI | 1.251806 | 1.251806 |
| WC | 1.007267 | 1.007267 |
| Smoking | 2.008718 | 2.008718 |
| SBP | 1.748987 | 1.748987 |
| DBP | 1.798052 | 1.798052 |
| eGFR | 4.910516 | 4.910516 |
| ALT | 3.606384 | 3.606384 |
| AST | 3.317735 | 3.317735 |
| TC | 1.445857 | 1.445857 |
| TG | 10.218024 | NA |
| HDL.C | 2.813887 | 2.813887 |
| LDL.C | 1.149792 | 1.149792 |
| FPG | 1.771996 | 1.771996 |
| UA | 1.119015 | 1.119015 |
| Diabetes | 2.606137 | 2.606137 |
| Hyperlipidemia | 1.088539 | 1.088539 |
| Statins | 1.417873 | 1.417873 |
| Antiplatelet medication | 1.368364 | 1.368364 |
| Diuretics | 1.14632 | 1.14632 |
| Beta-blockers | 1.11204 | 1.11204 |
| Calcium channel blockers | 3.24510 | 3.24510 |
| ACEIs/ARBs | 2.41681 | 2.41681 |
| Antidiabetic agents | 1.89653 | 1.89653 |

VIF = 1/(1-R2). VIF step-by-step screening method: Calculate the VIF of each variable. If the maximum VIF value ≥5, remove the variable with the maximum VIF value.

VIF: variance inflation factors. Other abbreviations, see Table 1.

**Table S2.** Sensitivity analysis of the relationship between obesity metabolism indices with hyperuricemia was performed after excluding patients with taking diuretics.

| Hyperuricemia | Model 1 | Model 2 | Model 3 | Model 4 |
| --- | --- | --- | --- | --- |
| OR (95% CI) P | OR (95% CI) P | OR (95% CI) P | OR (95% CI) P |
| TG/HDL |  |  |  |  |
| TG/HDL (per - 1SD increase) | 1.54 (1.44, 1.64)  <0.001 | 1.54 (1.44, 1.64)  <0.001 | 1.39 (1.31, 1.49)  <0.001 | 1.38 (1.29, 1.48)  <0.001 |
| Quartiles of TG/HDL |  |  |  |  |
| Q1 | Reference | Reference | Reference | Reference |
| Q2 | 1.70 (1.37, 2.12)  <0.001 | 1.77 (1.42, 2.22)  <0.001 | 1.51 (1.21, 1.91)  <0.001 | 1.55 (1.23, 1.96)  <0.001 |
| Q3 | 3.06 (2.49, 3.78)  <0.001 | 2.63 (2.65, 4.04)  <0.001 | 2.62 (2.11, 3.28)  <0.001 | 2.58(2.07, 3.23)  <0.001 |
| Q4 | 3.99 (3.26, 4.92)  <0.001 | 4.13 (3.36, 5.12)  <0.001 | 3.01 (2.40, 3.61)  <0.001 | 2.92 (2.33, 3.66)  <0.001 |
| P for trend | <0.001 | <0.001 | <0.001 | <0.001 |
| TyG |  |  |  |  |
| TyG (per - 1SD increase) | 1.86 (1.73, 2.00)  <0.001 | 1.87 (1.74, 2.02)  <0.001 | 1.87 (1.76, 2.13)  <0.001 | 1.86 (1.71, 2.12)  <0.001 |
| Quartiles of TyG |  |  |  |  |
| Q1 | Reference | Reference | Reference | Reference |
| Q2 | 1.65 (1.33, 2.07)  <0.001 | 1.72 (1.38, 2.15)  <0.001 | 1.70 (1.35, 2.15)  <0.001 | 1.73 (1.29, 2.06)  <0.001 |
| Q3 | 2.99 (2.43, 3.69)  <0.001 | 3.19 (2.59, 3.96)  <0.001 | 3.08 (2.46, 3.89)  <0.001 | 2.63 (2.18, 3.43)  <0.001 |
| Q4 | 4.34 (3.55, 5.35)  <0.001 | 4.51 (3.67, 5.57)  <0.001 | 4.51 (3.52, 2.79)  <0.001 | 3.99 (3.15, 5.08)  <0.001 |
| P for trend | <0.001 | <0.001 | <0.001 | <0.001 |
| TyG-BMI |  |  |  |  |
| TyG-BMI (per - 1SD increase) | 2.28 (2.15, 2.49)  <0.001 | 2.31 (2.17, 2.49)  <0.001 | 2.25 (2.18, 2.64)  <0.001 | 2.30 (2.20, 2.63)  <0.001 |
| Quartiles of TyG-BMI |  |  |  |  |
| Q1 | Reference | Reference | Reference | Reference |
| Q2 | 1.96 (1.55, 2.52)  <0.001 | 1.99 (1.56, 2.54)  <0.001 | 2.01 (1.56, 2.60)  <0.001 | 2.00 (1.56, 2.59)  <0.001 |
| Q3 | 3.39 (2.70, 4.29)  <0.001 | 3.44 (2.74, 4.36)  <0.001 | 3.61 (2.85, 4.61)  <0.001 | 3.64 (2.87, 4.67)  <0.001 |
| Q4 | 7.86 (6.31, 9.86)  <0.001 | 7.93 (6.36, 9.96)  <0.001 | 8.37 (6.66, 10.62)  <0.001 | 8.52 (6.75, 10.83)  <0.001 |
| P for trend | <0.001 | <0.001 | <0.001 | <0.001 |
| METS-IR |  |  |  |  |
| METS-IR (per - 1SD increase) | 2.78 (2.61, 3.00)  <0.001 | 2.81 (2.63, 3.11)  <0.001 | 3.36 (3.09, 3.85)  <0.001 | 3.31 (3.07, 3.96)  <0.001 |
| Quartiles of METS-IR |  |  |  |  |
| Q1 | Reference | Reference | Reference | Reference |
| Q2 | 2.28 (1.83, 2.86)  <0.001 | 2.39 (1.91, 3.01)  <0.001 | 2.21 (1.75, 2.79)  <0.001 | 2.34 (1.86, 2.96)  <0.001 |
| Q3 | 3.45 (2.79, 4.31)  <0.001 | 3.61 (2.90, 4.51)  <0.001 | 2.84 (2.26, 3.58)  <0.001 | 2.85 (2.62, 3.60)  <0.001 |
| Q4 | 4.76 (3.85, 5.91)  <0.001 | 4.91 (3.96, 6.11)  <0.001 | 3.59 (2.86, 4.54)  <0.001 | 3.42 (2.71, 4.33)  <0.001 |
| P for trend | <0.001 | <0.001 | <0.001 | <0.001 |
| METS-VF |  |  |  |  |
| METS-VF (per - 1SD increase) | 3.33 (3.08, 3.62)  <0.001 | 3.35 (3.10, 3.67)  <0.001 | 4.52 (4.27, 5.49)  <0.001 | 4.26 (4.14, 5.34)  <0.001 |
| Quartiles of METS-VF |  |  |  |  |
| Q1 | Reference | Reference | Reference | Reference |
| Q2 | 2.64 (2.09, 3.35)  <0.001 | 2.69 (2.13, 3.42)  <0.001 | 2.84 (2.25, 3.61)  <0.001 | 2.85 (2.26, 3.63)  <0.001 |
| Q3 | 3.71 (2.97, 4.69)  <0.001 | 3.80 (3.03, 4.80)  <0.001 | 4.22 (3.34, 5.37)  <0.001 | 4.25 (3.36, 5.41)  <0.001 |
| Q4 | 6.56 (5.26, 8.23)  <0.001 | 6.78 (5.43, 8.53)  <0.001 | 7.83 (6.18, 9.98)  <0.001 | 7.98 (6.30, 10.19)  <0.001 |
| P for trend | <0.001 | <0.001 | <0.001 | <0.001 |
| TyG-WC |  |  |  |  |
| TyG-WC (per - 1SD increase) | 2.14 (2.00, 2.28)  <0.001 | 2.14 (2.00, 2.29)  <0.001 | 1.98 (1.85, 2.15)  <0.001 | 2.01 (1.86, 2.16)  <0.001 |
| Quartiles of TyG-WC |  |  |  |  |
| Q1 | Reference | Reference | Reference | Reference |
| Q2 | 1.79 (1.42, 2.27)  <0.001 | 1.76 (1.39, 2.23)  <0.001 | 1.80 (1.42, 2.28)  <0.001 | 1.69 (1.33, 2.37)  <0.001 |
| Q3 | 2.94 (2.37, 3.69)  <0.001 | 2.92 (2.34, 3.66)  <0.001 | 2.95 (2.36, 3.69)  <0.001 | 2.58 (2.05, 3.28)  <0.001 |
| Q4 | 6.43 (5.21, 7.97)  <0.001 | 6.47 (5.24, 8.05)  <0.001 | 6.35 (5.13, 7.90)  <0.001 | 5.08 (4.01, 6.48)  <0.001 |
| P for trend | <0.001 | <0.001 | <0.001 | <0.001 |

Model 1: no covariates were adjusted.

Model 2: age, sex, BMI, smoking status, Diabetes, and Hyperlipidemia were adjusted.

Model 3: Model 2 plus adjustment for ALT, AST, Cr, eGFR, TC, HDL.C, LDL.C, FPG, and UA.

Model 4: Model 3 plus adjustment for use of statins, Antiplatelet medication, beta-blockers, calcium channel blockers, ACEIs/ARBs, and Antidiabetic agents.

Abbreviations: WC, waist circumference; BMI, body mass index; TyG, triglyceride-glucose; METS**-**IR, metabolic score for insulin resistance; METS-VF, metabolic score for visceral fat; OR, odds ratio; CI, confidence interval.

Other abbreviations, see Table 1.

**Table S3.** Sensitivity analysis of the relationship between obesity metabolism indices with hyperuricemia was performed after excluding patients with BMI>30 kg/m2.

| Hyperuricemia | Model 1 | Model 2 | Model 3 | Model 4 |
| --- | --- | --- | --- | --- |
| OR (95% CI) P | OR (95% CI) P | OR (95% CI) P | OR (95% CI) P |
| TG/HDL |  |  |  |  |
| TG/HDL (per - 1SD increase) | 1.52 (1.46, 1.65)  <0.001 | 1.40 (1.24, 1.65)  <0.001 | 1.28 (1.13, 1.40)  0.018 | 1.21 (1.02, 1.39)  0.034 |
| Quartiles of TG/HDL |  |  |  |  |
| Q1 | Reference | Reference | Reference | Reference |
| Q2 | 1.69 (1.36, 2.11)  <0.001 | 1.76 (1.41, 2.20)  <0.001 | 1.74 (1.39, 2.18)  0.006 | 1.30 (1.11, 1.78)  0.004 |
| Q3 | 2.86 (2.32, 3.53)  <0.001 | 3.02 (2.44, 3.74)  <0.001 | 2.88 (2.32, 3.57)  <0.001 | 1.59 (1.17, 2.18)  <0.001 |
| Q4 | 4.09 (3.34, 5.03)  <0.001 | 4.20 (3.41, 5.19)  <0.001 | 3.87 (3.13, 4.79)  <0.001 | 2.32 (2.04, 3.09)  <0.001 |
| P for trend | <0.001 | <0.001 | <0.001 | <0.001 |
| TyG |  |  |  |  |
| TyG (per - 1SD increase) | 1.87 (1.71, 2.03)  <0.001 | 1.79 (1.67, 1.91)  <0.001 | 1.81 (1.69, 2.04)  <0.001 | 1.75 (1.54, 2.01)  <0.001 |
| Quartiles of TyG |  |  |  |  |
| Q1 | Reference | Reference | Reference | Reference |
| Q2 | 1.59 (1.27, 2.00)  <0.001 | 1.64 (1.31, 2.07)  <0.001 | 1.61 (1.28, 2.03)  <0.001 | 1.66 (1.23, 1.88)  <0.001 |
| Q3 | 3.08 (2.49, 3.83)  <0.001 | 3.23 (2.60, 4.02)  <0.001 | 3.05 (2.46, 3.81)  <0.001 | 2.96 (2.21, 3.98)  <0.001 |
| Q4 | 4.48 (3.65, 5.54)  <0.001 | 4.62 (3.75, 5.73)  <0.001 | 4.38 (3.54, 5.43)  <0.001 | 4.35 (3.06, 5.15)  <0.001 |
| P for trend | <0.001 | <0.001 | <0.001 | <0.001 |
| TyG-BMI |  |  |  |  |
| TyG-BMI (per - 1SD increase) | 2.28 (2.14, 2.44)  <0.001 | 2.30 (2.15, 2.46)  <0.001 | 2.33 (2.19, 2.51)  <0.001 | 2.36 (2.19, 2.54)  <0.001 |
| Quartiles of TyG-BMI |  |  |  |  |
| Q1 | Reference | Reference | Reference | Reference |
| Q2 | 2.21 (1.71, 2.86)  <0.001 | 2.20 (1.70, 2.85)  <0.001 | 2.13 (1.65, 2.77)  <0.001 | 2.21 (1.69, 2.90)  <0.001 |
| Q3 | 3.74 (2.95, 4.96)  <0.001 | 3.74 (2.94, 4.80)  <0.001 | 3.76 (2.95, 4.83)  <0.001 | 3.82 (2.97, 4.97)  <0.001 |
| Q4 | 7.85 (6.23, 9.97)  <0.001 | 7.79 (6.17, 9.77)  <0.001 | 7.69 (6.09, 9.79)  <0.001 | 8.15 (6.37, 10.51)  <0.001 |
| P for trend | <0.001 | <0.001 | <0.001 | <0.001 |
| METS-IR |  |  |  |  |
| METS-IR (per - 1SD increase) | 2.78 (2.58, 3.01)  <0.001 | 2.83 (2.61, 4.06)  <0.001 | 3.45 (3.11, 3.92)  <0.001 | 3.27 (3.03, 3.81)  <0.001 |
| Quartiles of METS-IR |  |  |  |  |
| Q1 | Reference | Reference | Reference | Reference |
| Q2 | 2.56 (1.63, 2.53)  <0.001 | 2.65 (2.16, 3.26)  <0.001 | 2.08 (1.67, 2.61)  <0.001 | 2.19 (1.75, 2.74)  <0.001 |
| Q3 | 3.56 (2.96, 4.47)  <0.001 | 3.67 (3.01, 4.51)  <0.001 | 2.25 (1.79, 2.86)  <0.001 | 2.22 (1.75, 2.82)  <0.001 |
| Q4 | 5.06 (6.40, 9.56)  <0.001 | 5.14 (4.22, 6.28)  <0.001 | 2.53 (1.95, 3.31)  <0.001 | 2.36 (1.81, 3.08)  <0.001 |
| P for trend | <0.001 | <0.001 | <0.001 | <0.001 |
| METS-VF |  |  |  |  |
| METS-VF (per - 1SD increase) | 3.32 (3.05, 3.63)  <0.001 | 3.31 (3.09, 3.67)  <0.001 | 4.63 (4.14, 5.50)  <0.001 | 4.58 (4.09, 5.32)  <0.001 |
| Quartiles of METS-VF |  |  |  |  |
| Q1 | Reference | Reference | Reference | Reference |
| Q2 | 2.66 (2.15, 3.30)  <0.001 | 2.69 (2.18, 3.34)  <0.001 | 2.81 (2.10, 3.43)  <0.001 | 2.78 (2.16, 3.45)  <0.001 |
| Q3 | 3.91 (3.19, 4.83)  <0.001 | 3.93 (3.20, 4.88)  <0.001 | 4.15 (3.19, 5.07)  <0.001 | 4.08 (3.27, 5.16)  <0.001 |
| Q4 | 6.35 (5.21, 7.83)  <0.001 | 6.53 (5.34, 8.11)  <0.001 | 6.72 (5.40, 8.54)  <0.001 | 6.81 (5.53, 8.74)  <0.001 |
| P for trend | <0.001 | <0.001 | <0.001 | <0.001 |
| TyG-WC |  |  |  |  |
| TyG-WC (per - 1SD increase) | 2.14 (2.01, 2.33)  <0.001 | 2.16 (2.01, 2.38)  <0.001 | 2.06 (1.74, 2.26)  <0.001 | 2.03 (1.75, 2.29)  <0.001 |
| Quartiles of TyG-WC |  |  |  |  |
| Q1 | Reference | Reference | Reference | Reference |
| Q2 | 1.86 (1.51, 2.34)  <0.001 | 1.82 (1.49, 2.35)  <0.001 | 1.77 (1.43, 2.21)  <0.001 | 1.75 (1.40, 2.24)  <0.001 |
| Q3 | 3.04 (2.40, 3.73)  <0.001 | 3.01 (2.42, 3.77)  <0.001 | 2.69 (2.18, 3.33)  <0.001 | 2.64 (2.13, 3.32)  <0.001 |
| Q4 | 6.48 (5.37, 7.98)  <0.001 | 6.35 (5.45, 8.04)  <0.001 | 5.09 (4.12, 6.31)  <0.001 | 5.07 (4.13, 6.37)  <0.001 |
| P for trend | <0.001 | <0.001 | <0.001 | <0.001 |

Model 1: no covariates were adjusted.

Model 2: age, sex, BMI, smoking status, Diabetes, and Hyperlipidemia were adjusted.

Model 3: Model 2 plus adjustment for ALT, AST, Cr, eGFR, TC, HDL.C, LDL.C, FPG, and UA.

Model 4: Model 3 plus adjustment for use of statins, Antiplatelet medication, beta-blockers, calcium channel blockers, ACEIs/ARBs, and Antidiabetic agents.

Abbreviations: WC, waist circumference; BMI, body mass index; TyG, triglyceride-glucose; METS**-**IR, metabolic score for insulin resistance; METS-VF, metabolic score for visceral fat; OR, odds ratio; CI, confidence interval.

Other abbreviations, see Table 1.

**Table S4.** Sensitivity analysis of the relationship between obesity metabolism indices with hyperuricemia was performed after excluding patients with cancer.

| Hyperuricemia | Model 1 | Model 2 | Model 3 | Model 4 |
| --- | --- | --- | --- | --- |
| OR (95% CI) P | OR (95% CI) P | OR (95% CI) P | OR (95% CI) P |
| TG/HDL |  |  |  |  |
| TG/HDL (per - 1SD increase) | 1.54 (1.47, 1.64)  <0.001 | 1.46 (1.37, 1.55)  <0.001 | 1.18 (1.04, 1.38)  0.009 | 1.17 (1.02, 1.35)  0.024 |
| Quartiles of TG/HDL |  |  |  |  |
| Q1 | Reference | Reference | Reference | Reference |
| Q2 | 1.62 (1.33, 1.98)  <0.001 | 1.50 (1.21, 1.83)  <0.001 | 1.34 (1.07, 1.65)  0.006 | 1.35 (1.11, 1.68)  0.003 |
| Q3 | 2.98 (2.48, 3.62)  <0.001 | 2.67 (2.19, 3.24)  <0.001 | 2.25 (1.83, 2.74)  <0.001 | 2.19 (1.79, 2.68)  <0.001 |
| Q4 | 3.94 (3.29, 4.76)  <0.001 | 3.30 (2.71, 4.01)  <0.001 | 2.53 (2.07, 3.10)  <0.001 | 2.44 (1.98, 2.99)  <0.001 |
| P for trend | <0.001 | <0.001 | <0.001 | <0.001 |
| TyG |  |  |  |  |
| TyG (per - 1SD increase) | 1.85 (1.72, 1.97)  <0.001 | 1.77 (1.65, 1.89)  <0.001 | 1.84 (1.68, 1.99)  <0.001 | 1.81 (1.67, 1.96)  <0.001 |
| Quartiles of TyG |  |  |  |  |
| Q1 | Reference | Reference | Reference | Reference |
| Q2 | 1.64 (1.35, 2.01)  <0.001 | 1.56 (1.28, 1.93)  <0.001 | 1.51 (1.24, 1.87)  <0.001 | 1.51 (1.22, 1.88)  <0.001 |
| Q3 | 3.09 (2.54, 3.74)  <0.001 | 2.85 (2.35, 3.47)  <0.001 | 2.65 (2.16, 3.25)  <0.001 | 2.54 (2.06, 3.13)  <0.001 |
| Q4 | 4.37 (3.63, 5.27)  <0.001 | 3.92 (3.24, 4.76)  <0.001 | 3.69 (2.97, 4.58)  <0.001 | 3.57 (2.94, 4.46)  <0.001 |
| P for trend | <0.001 | <0.001 | <0.001 | <0.001 |
| TyG-BMI |  |  |  |  |
| TyG-BMI (per - 1SD increase) | 2.28 (2.13, 2.44)  <0.001 | 2.30 (2.14, 2.47)  <0.001 | 2.32 (2.20, 2.53)  <0.001 | 2.35 (2.18, 2.56)  <0.001 |
| Quartiles of TyG-BMI |  |  |  |  |
| Q1 | Reference | Reference | Reference | Reference |
| Q2 | 2.03 (1.64, 2.55)  <0.001 | 2.02 (1.60, 2.52)  <0.001 | 1.93 (1.53, 2.44)  <0.001 | 1.92 (1.51, 2.43)  <0.001 |
| Q3 | 3.63 (2.95, 4.47)  <0.001 | 3.66 (2.96, 4.53)  <0.001 | 3.69 (2.96, 4.60)  <0.001 | 3.73 (2.98, 4.65)  <0.001 |
| Q4 | 7.79 (6.38, 9.56)  <0.001 | 7.84 (6.38, 9.65)  <0.001 | 7.95 (6.43, 9.85)  <0.001 | 8.09 (6.52, 10.02)  <0.001 |
| P for trend | <0.001 | <0.001 | <0.001 | <0.001 |
| METS-IR |  |  |  |  |
| METS-IR (per - 1SD increase) | 2.77 (2.59, 2.98)  <0.001 | 2.77 (2.56, 2.98)  <0.001 | 3.46 (3.12, 3.86)  <0.001 | 3.38 (3.04, 3.79)  <0.001 |
| Quartiles of METS-IR |  |  |  |  |
| Q1 | Reference | Reference | Reference | Reference |
| Q2 | 2.56 (1.62, 2.53)  <0.001 | 2.65 (2.16, 3.27)  <0.001 | 2.08 (1.65, 2.60)  <0.001 | 2.18 (1.72, 2.74)  <0.001 |
| Q3 | 3.56 (2.93, 4.46)  <0.001 | 3.67 (3.01, 4.53)  <0.001 | 2.26 (1.77, 2.86)  <0.001 | 2.22 (1.75, 2.82)  <0.001 |
| Q4 | 5.06 (6.35, 9.54)  <0.001 | 5.14 (4.22, 6.29)  <0.001 | 2.52 (1.94, 3.31)  <0.001 | 2.35 (1.80, 3.08)  <0.001 |
| P for trend | <0.001 | <0.001 | <0.001 | <0.001 |
| METS-VF |  |  |  |  |
| METS-VF (per - 1SD increase) | 3.31 (3.05, 3.58)  <0.001 | 3.32 (3.06, 3.59)  <0.001 | 4.75 (4.24, 5.33)  <0.001 | 4.61 (4.10, 5.21)  <0.001 |
| Quartiles of METS-VF |  |  |  |  |
| Q1 | Reference | Reference | Reference | Reference |
| Q2 | 2.63 (2.11, 3.29)  <0.001 | 2.67 (2.15, 3.34)  <0.001 | 2.71 (2.21, 3.40)  <0.001 | 2.72 (2.19, 3.39)  <0.001 |
| Q3 | 3.85 (3.14, 4.76)  <0.001 | 3.93 (3.20, 4.85)  <0.001 | 4.03 (3.30, 4.98)  <0.001 | 4.09 (3.31, 5.11)  <0.001 |
| Q4 | 6.30 (5.15, 7.75)  <0.001 | 6.49 (5.30, 7.98)  <0.001 | 6.68 (5.44, 8.23)  <0.001 | 6.86 (5.57, 8.61)  <0.001 |
| P for trend | <0.001 | <0.001 | <0.001 | <0.001 |
| TyG-WC |  |  |  |  |
| TyG-WC (per - 1SD increase) | 2.14 (1.99, 2.28)  <0.001 | 2.14 (2.01, 2.31)  <0.001 | 1.97 (1.84, 2.15)  <0.001 | 2.01 (1.86, 2.16)  <0.001 |
| Quartiles of TyG-WC |  |  |  |  |
| Q1 | Reference | Reference | Reference | Reference |
| Q2 | 1.84 (1.50, 2.32)  <0.001 | 1.85 (1.49, 2.28)  <0.001 | 1.78 (1.45, 2.24)  <0.001 | 1.77 (1.42, 2.21)  <0.001 |
| Q3 | 2.98 (2.45, 3.67)  <0.001 | 2.99 (2.43, 3.67)  <0.001 | 2.69 (2.19, 3.35)  <0.001 | 2.64 (2.12, 3.35)  <0.001 |
| Q4 | 6.52 (5.41, 7.96)  <0.001 | 6.53 (5.39, 7.95)  <0.001 | 5.09 (4.11, 6.32)  <0.001 | 5.11 (4.10, 6.39)  <0.001 |
| P for trend | <0.001 | <0.001 | <0.001 | <0.001 |

Model 1: no covariates were adjusted.

Model 2: age, sex, BMI, smoking status, Diabetes, and Hyperlipidemia were adjusted.

Model 3: Model 2 plus adjustment for ALT, AST, Cr, eGFR, TC, HDL.C, LDL.C, FPG, and UA.

Model 4: Model 3 plus adjustment for use of statins, Antiplatelet medication, beta-blockers, calcium channel blockers, ACEIs/ARBs, and Antidiabetic agents.

Abbreviations: WC, waist circumference; BMI, body mass index; TyG, triglyceride-glucose; METS**-**IR, metabolic score for insulin resistance; METS-VF, metabolic score for visceral fat; OR, odds ratio; CI, confidence interval.

Other abbreviations, see Table 1.

**Table S5.** E-values for the observed associations between obesity metabolism indices and hyperuricemia.

|  | Model 1  OR (95% CI) | Model 2  OR (95% CI) | Model 3  OR (95% CI) | Model 4  OR (95% CI) |
| --- | --- | --- | --- | --- |
| TG/HDL (per - 1SD increase) | 1.54 (1.46, 1.63) | 1.46 (1.38, 1.55) | 1.18 (1.03, 1.35) | 1.16 (1.01, 1.33) |
| E-value for TG/HDL | 2.45 | 2.28 | 1.64 | 1.59 |
| TyG (per - 1SD increase) | 1.85 (1.74, 1.97) | 1.77 (1.66, 1.89)  <0.001 | 1.84 (1.70, 1.99) | 1.81 (1.67, 1.96) |
| E-value for TyG | 3.10 | 2.94 | 3.08 | 3.02 |
| TyG-BMI (per - 1SD increase) | 2.28 (2.14, 2.44) | 2.30 (2.15, 2.46) | 2.33 (2.19, 2.51) | 2.36 (2.19, 2.54) |
| E-value for TyG-BMI | 3.99 | 4.03 | 4.09 | 4.15 |
| METS-IR (per - 1SD increase) | 2.77 (2.59, 2.98) | 2.78 (2.59, 2.99) | 3.49 (3.15, 3.87) | 3.39 (3.06, 3.76) |
| E-value for METS-IR | 4.98 | 5.00 | 6.44 | 6.24 |
| METS-VF (per - 1SD increase) | 3.31 (3.06, 3.58) | 3.32 (3.07, 3.59) | 4.75 (4.24, 5.33) | 4.62 (4.12, 5.20) |
| E-value for METS-VF | 6.08 | 6.09 | 8.97 | 8.71 |
| TyG-WC (per - 1SD increase) | 2.14 (2.00, 2.28) | 2.14 (2.00, 2.29) | 1.98 (1.85, 2.15) | 2.01 (1.86, 2.16) |
| E-value for TyG-WC | 3.70 | 3.70 | 3.72 | 3.43 |

Model 1: no covariates were adjusted.

Model 2: age, sex, BMI, smoking status, Diabetes, and Hyperlipidemia were adjusted.

Model 3: Model 2 plus adjustment for ALT, AST, Cr, eGFR, TC, HDL.C, LDL.C, FPG, and UA.

Model 4: Model 3 plus adjustment for use of statins, Antiplatelet medication, beta-blockers, calcium channel blockers, ACEIs/ARBs, and Antidiabetic agents.

Abbreviations: WC, waist circumference; BMI, body mass index; TyG, triglyceride-glucose; METS**-**IR, metabolic score for insulin resistance; METS-VF, metabolic score for visceral fat; OR, odds ratio; CI, confidence interval.

Other abbreviations, see Table 1.

# Supplementary Figures and Tables

## Supplementary Figures


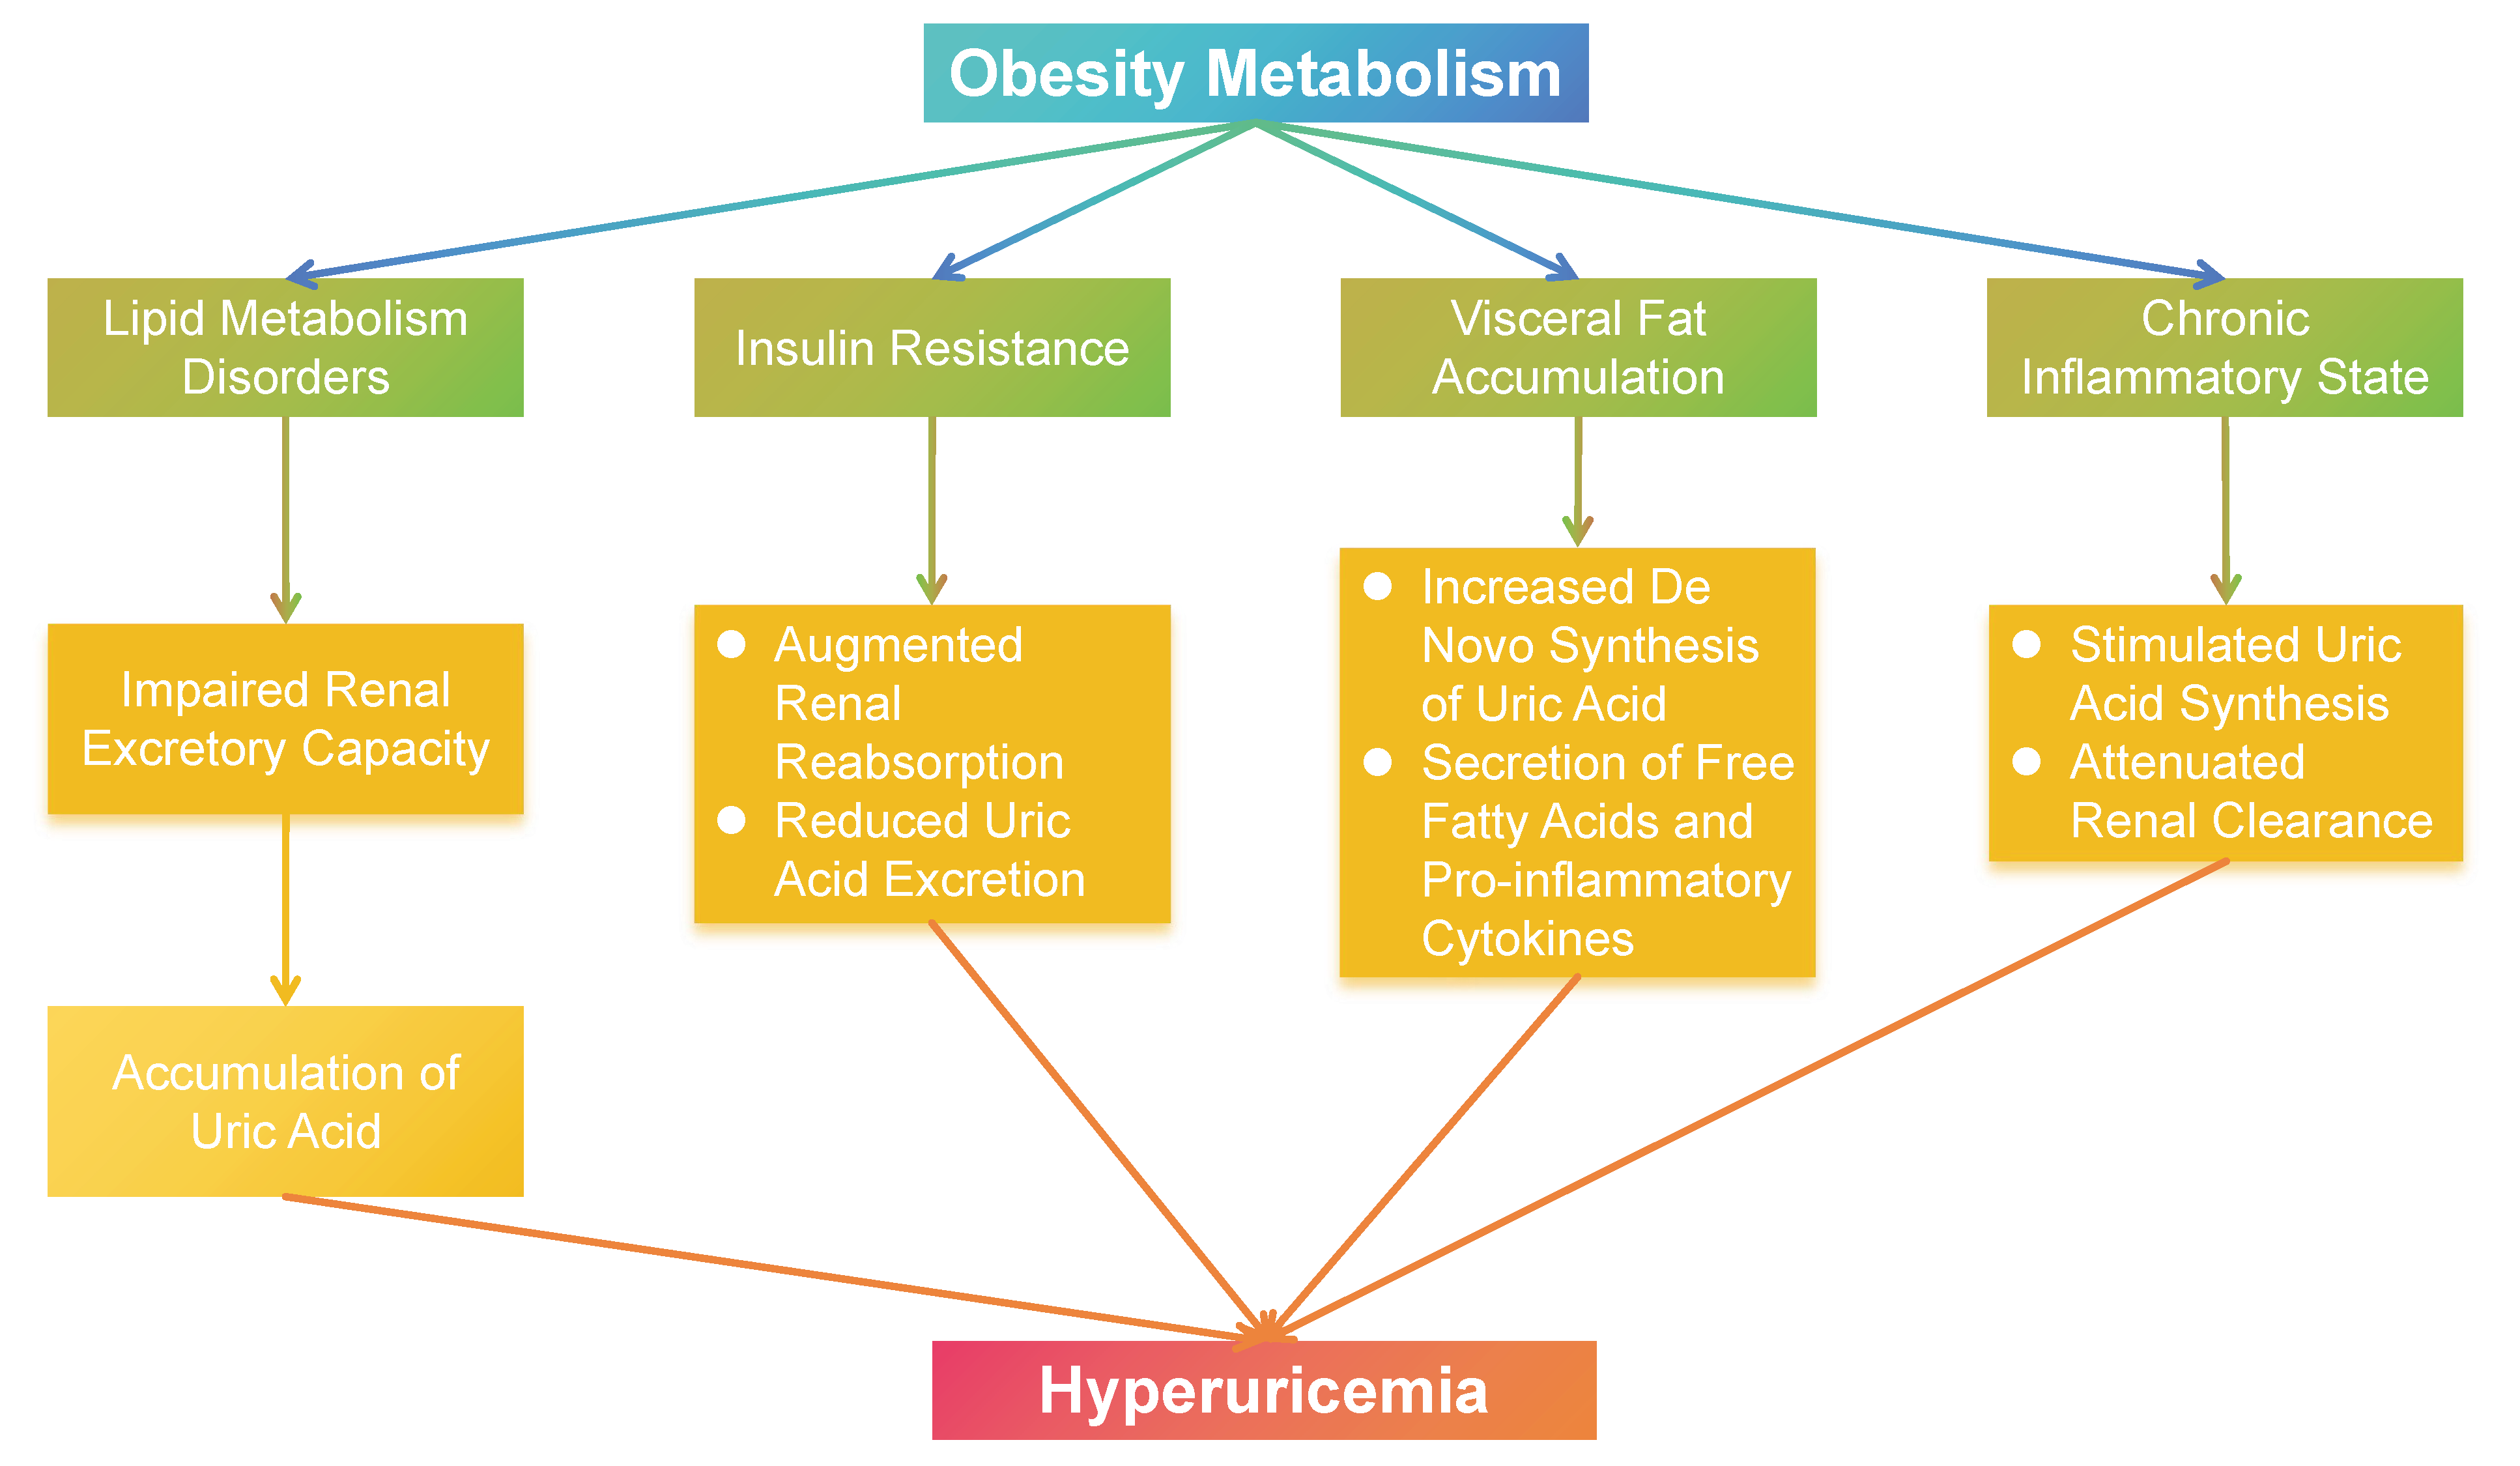


**Figure S1.** Mechanistic pathways linking obesity metabolism to hyperuricemia.

**References**

1. De Bacquer D, Ueda P, Reiner Ž, De Sutter J, De Smedt D, Lovic D, et al. Prediction of recurrent event in patients with coronary heart disease: the EUROASPIRE Risk Model. European journal of preventive cardiology. 2022;29(2):328-39. Epub 2021/02/25. doi: 10.1093/eurjpc/zwaa128. PubMed PMID: 33623999.

2. Tunstall-Pedoe H. The decline in coronary heart disease; did it fall or was it pushed? BMJ (Clinical research ed). 2012;344:d7809. Epub 2012/01/27. doi: 10.1136/bmj.d7809. PubMed PMID: 22279112.

3. Liu Y, Zhu B, Zhou W, Du Y, Qi D, Wang C, et al. Triglyceride-glucose index as a marker of adverse cardiovascular prognosis in patients with coronary heart disease and hypertension. Cardiovascular diabetology. 2023;22(1):133. Epub 2023/06/10. doi: 10.1186/s12933-023-01866-9. PubMed PMID: 37296406; PubMed Central PMCID: PMCPMC10257289.

4. Tao S, Yu L, Li J, Huang L, Huang X, Zhang W, et al. Association between the triglyceride-glucose index and 1-year major adverse cardiovascular events in patients with coronary heart disease and hypertension. Cardiovascular diabetology. 2023;22(1):305. Epub 2023/11/09. doi: 10.1186/s12933-023-02018-9. PubMed PMID: 37940943; PubMed Central PMCID: PMCPMC10633928.

5. Type 2 diabetes--time to change our approach. Lancet (London, England). 2010;375(9733):2193. Epub 2010/07/09. doi: 10.1016/s0140-6736(10)61011-2. PubMed PMID: 20609952.

6. Guber C. Type 2 diabetes. Lancet (London, England). 2005;365(9467):1347. Epub 2005/04/13. doi: 10.1016/s0140-6736(05)61033-1. PubMed PMID: 15823386.

7. Shafrir E, Malecki M, Schernthaner G, Kiljanski J. Treatment of type 2 diabetes mellitus. Introduction. Diabetes research and clinical practice. 2008;82 Suppl 2:S81-2. Epub 2008/11/21. doi: 10.1016/j.diabres.2008.09.019. PubMed PMID: 19019474.

8. Wang D, Chen J, Zhou Y, Ma J, Zhou M, Xiao L, et al. Association between sleep duration, sleep quality and hyperlipidemia in middle-aged and older Chinese: The Dongfeng-Tongji Cohort Study. European journal of preventive cardiology. 2019;26(12):1288-97. Epub 2019/04/11. doi: 10.1177/2047487319843068. PubMed PMID: 30966819.

9. Li J, Dong Z, Wu H, Liu Y, Chen Y, Li S, et al. The triglyceride-glucose index is associated with atherosclerosis in patients with symptomatic coronary artery disease, regardless of diabetes mellitus and hyperlipidaemia. Cardiovascular diabetology. 2023;22(1):224. Epub 2023/08/25. doi: 10.1186/s12933-023-01919-z. PubMed PMID: 37620954; PubMed Central PMCID: PMCPMC10463708.
